# Supplementary material
Source: PubMed Central journal article supplement (PMC1797354)
Supplement: jbacter_189_4_1288__2.pdf [file jbacter_189_4_1288__2.pdf]

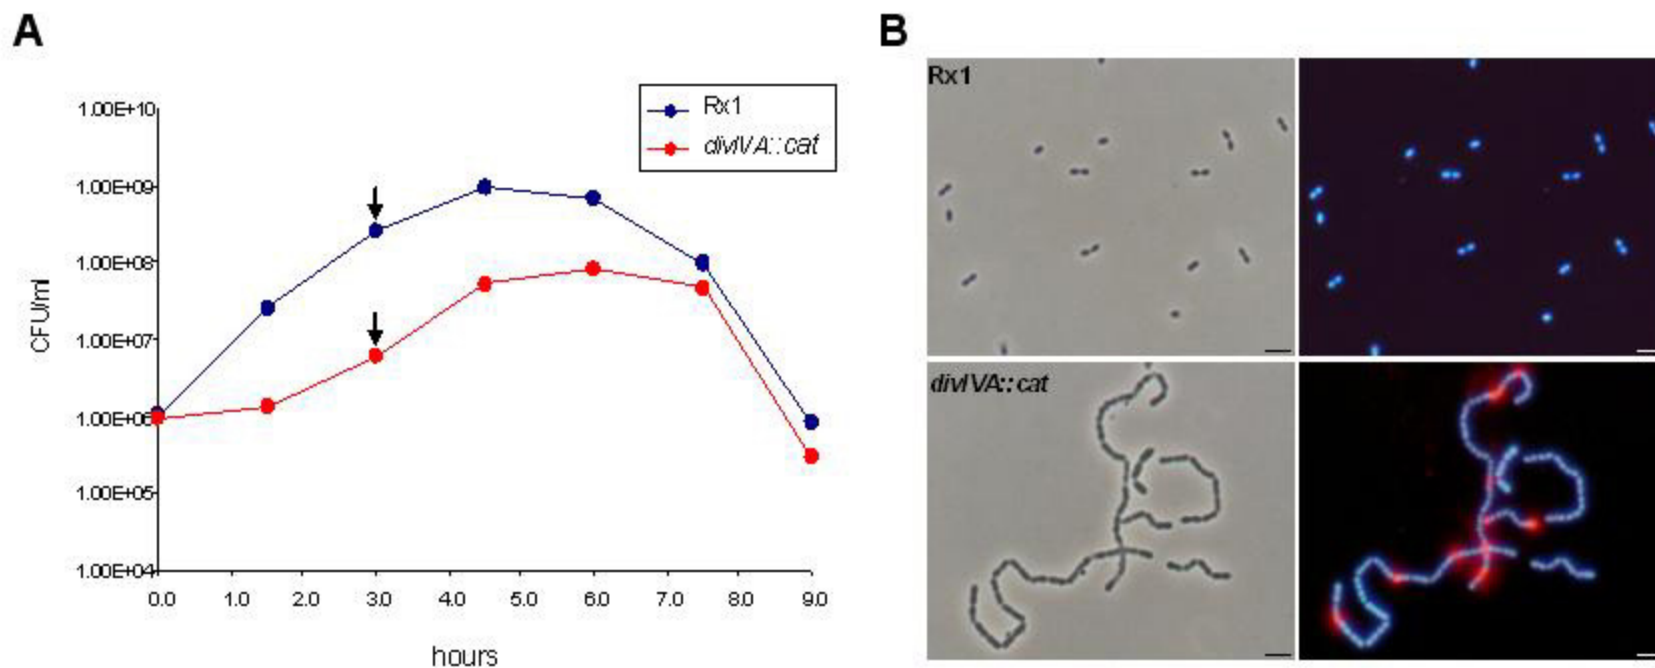

Figure S2. Correlation between growth and viability in the Rx1 wild-type strain and in the Rx1 *divIVA::cat* mutant (Fadda *et al.*, 2003). A) Viable counts during the course of growth. B) Characterization of *S. pneumoniae* cells with a live/dead assay. Growth was monitored turbidimetrically at 650 nm every 30 min for 9 hours. Viable counts were determined every 90 min by serial dilution of the cultures and spot-plating 20  $\mu$ l on TSA plates, supplemented with 5% defibrinated sheep blood. Exponentially growing unfixed cells taken at the time indicated by the arrow in A tested with a live/dead test as described in the Material and Methods. The red cells are dead cells in the process of lysing. The scale bar represents 2  $\mu$ m.
